# Supplementary material
Source: publisher figshare collection journal article supplement (https://acs.figshare.com/ndownloader/files/8220740)
Supplement: Supplementary file 1 [file 8220740]

## Supporting Information

# Enhancing electrocatalytic activity for hydrogen evolution by strongly coupled molybdenum nitride@nitrogen-doped carbon porous nano octahedrons

*Yanping Zhu,<sup>†</sup> Gao Chen,<sup>†</sup> Xiaomin Xu,<sup>†</sup> Guangming Yang,<sup>†</sup> Meilin Liu,<sup>\*,‡</sup> and*

*Zongping Shao<sup>\*,§,||</sup>*

<sup>†</sup> Jiangsu National Synergetic Innovation Center for Advanced Materials (SICAM), State Key Laboratory of Materials-Oriented Chemical Engineering, College of Chemical Engineering, Nanjing Tech University, No.5 Xin Mofan Road, Nanjing 210009, P.R. China

<sup>‡</sup> Center for Innovative Fuel Cell and Battery Technologies, School of Materials Science and Engineering, Georgia Institute of Technology, Atlanta, GA 30332-0245, USA. Email: [meilin.liu@mse.gatech.edu](mailto:meilin.liu@mse.gatech.edu)

<sup>§</sup> College of Energy, Nanjing Tech University, No.5 Xin Mofan Road, Nanjing 210009, P.R. China. Email: [shaozp@njtech.edu.cn](mailto:shaozp@njtech.edu.cn)

<sup>||</sup> Department of Chemical Engineering, Curtin University, Perth, Western Australia 6845, Australia

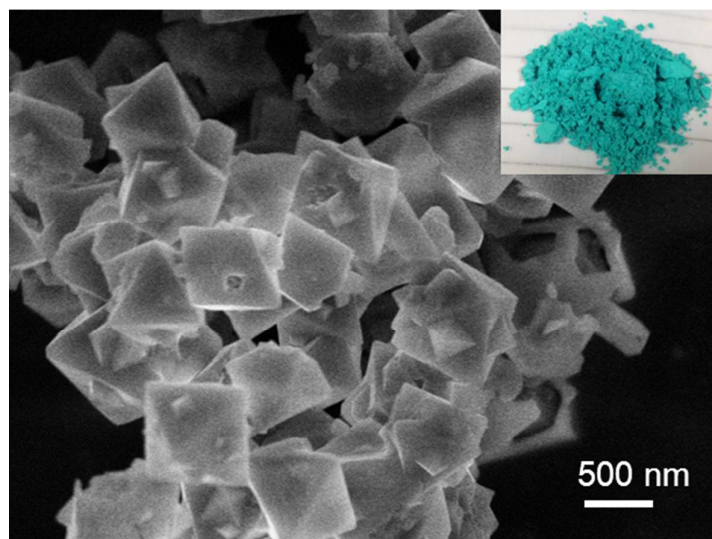

**Figure S1.** FESEM image (inset: digital photo) of the as-prepared NENU-5 nano-octahedrons.

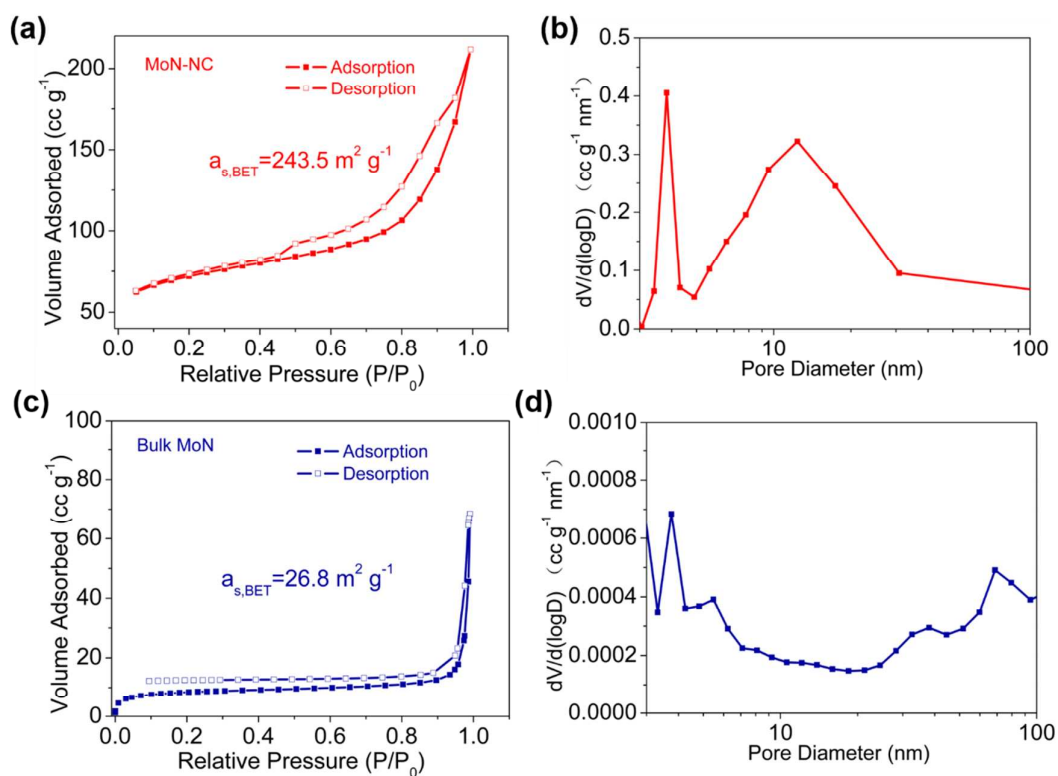

**Figure S2.** The N<sub>2</sub> sorption isotherms and the corresponding pore diameter distributions of (a, b) MoN-NC nano-octahedrons and (c, d) bulk MoN.

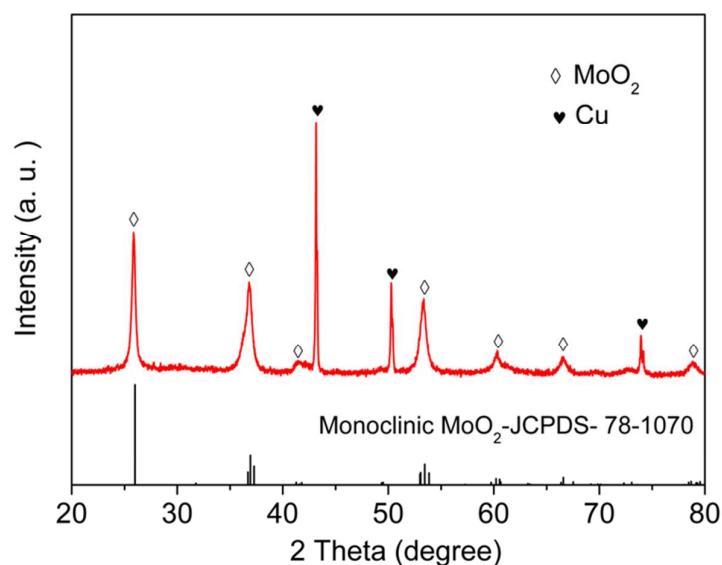

**Figure S3.** XRD pattern of the composite after the first thermal treatment of NENU-5.

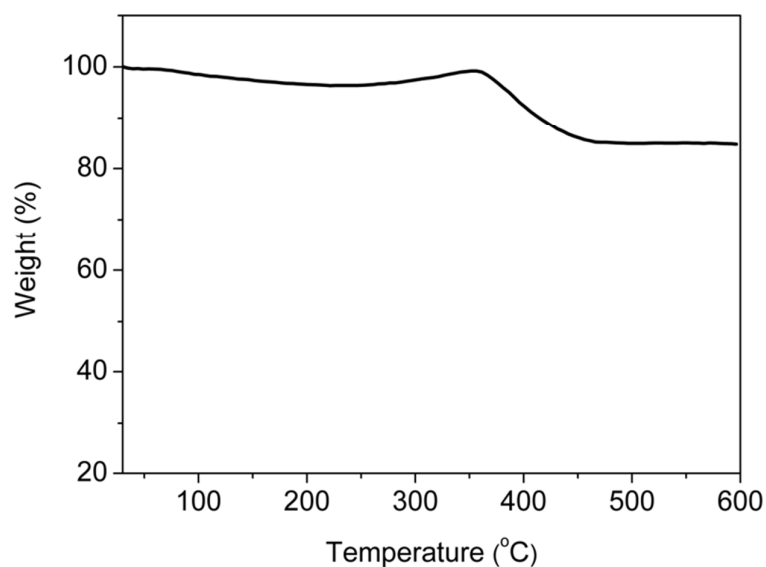

**Figure S4.** TGA curve of the MoN-NC nano-octahedrons.

The thermogravimetric (TG) result of the MoN-NC nano-octahedrons is shown in Fig. S2. Clearly, the weight loss before 200 °C comes from absorbed moisture (3.4 wt%). The weight change between 200 and 500 °C is due to both the gradual oxidation of MoN to MoO<sub>3</sub>, and the combustion of carbon. Over 500 °C, the weight remains constant. Assuming that the sample converts to only MoO<sub>3</sub> after heating to 600 °C with remaining weight of 84.7 wt%, the carbon content is calculate to be 32.0 wt%.

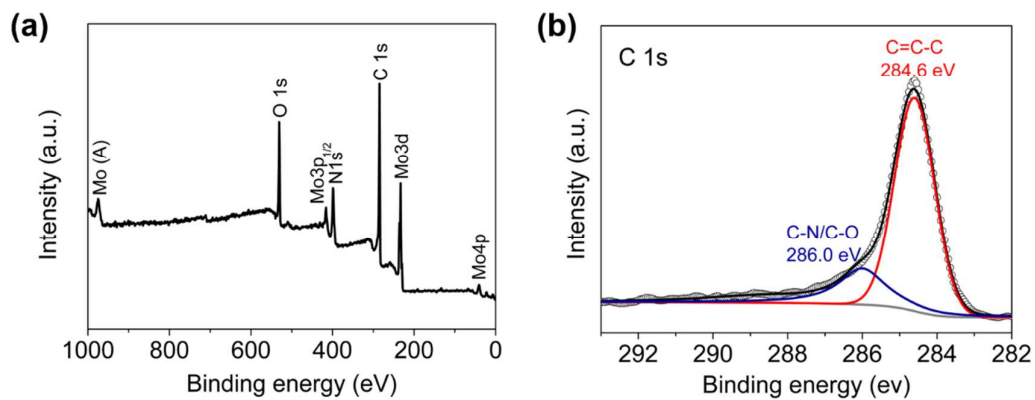

**Figure S5.** (a) Survey XPS spectrum of the MoN-NC nano-octahedrons. (b) high-resolution XPS spectrum of C 1s.

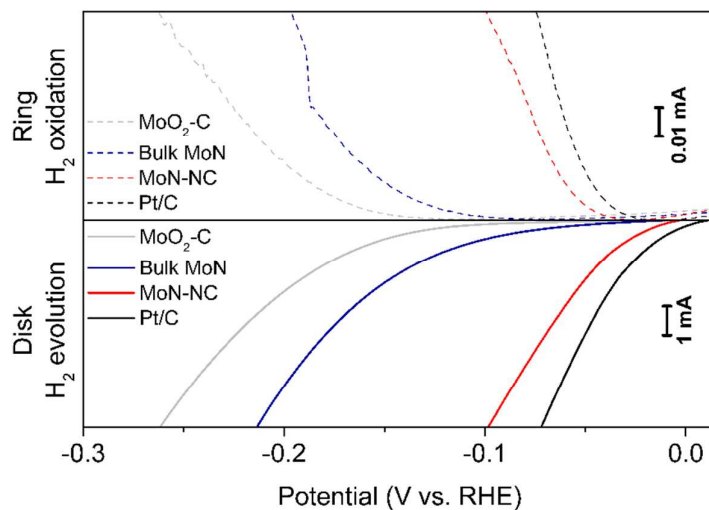

**Figure S6.** RRDE measurements of H<sub>2</sub> evolution on different catalyst-modified electrodes. The potential of the Pt-ring electrode was kept at 0.7 V for oxidation of the H<sub>2</sub> produced from the catalysts on the disk electrode.

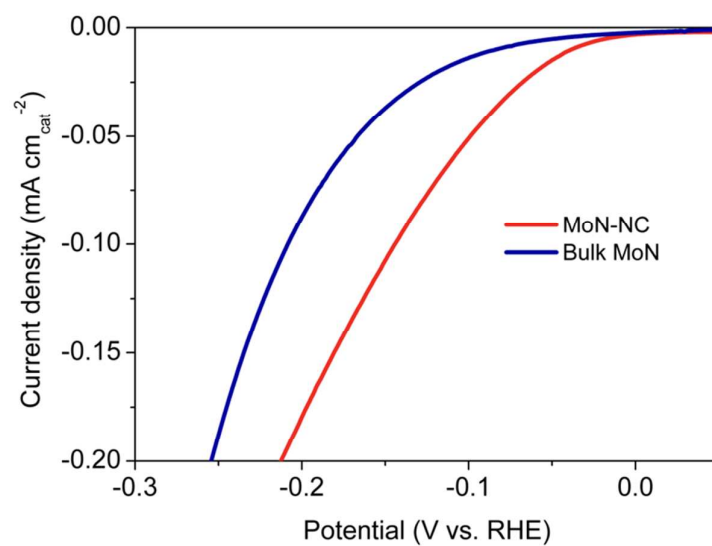

**Figure S7.** Polarization curves (normalized by the specific surface area) for the MoN-NC and the bulk MoN catalysts recorded in 0.5 M  $\text{H}_2\text{SO}_4$ .

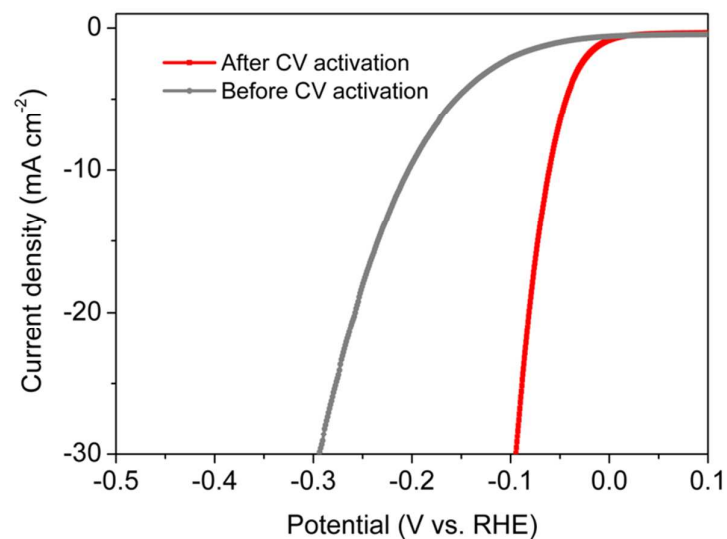

**Figure S8.** Polarization curves of the MoN-NC nano-octahedrons catalyst before and after CV activation.

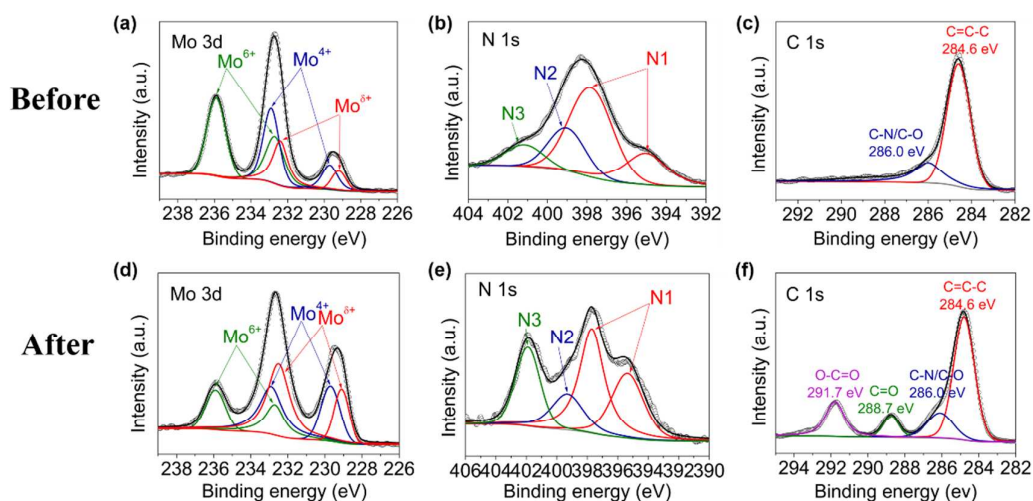

**Figure S9.** XPS spectra of the MoN-NC nano-octahedrons (a, b, c) before and (d, e, f) after the activation process.

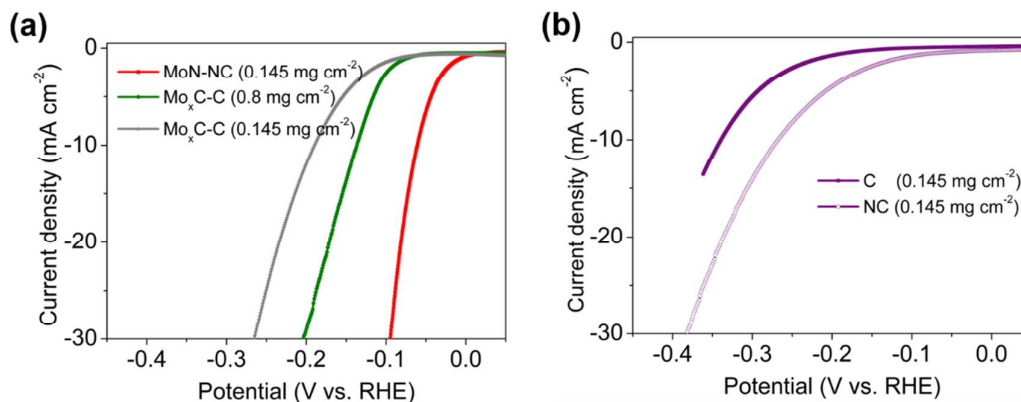

**Figure S10.** Polarization curves (iR-compensated) in 0.5 M  $\text{H}_2\text{SO}_4$  of the (a) MoN-NC nano-octahedrons ( $0.145 \text{ mg cm}^{-2}$ ) and  $\text{MoC}_x\text{-C}$  nano-octahedrons ( $0.145 \text{ mg cm}^{-2}$ ,  $0.8 \text{ mg cm}^{-2}$ ); (b) the blank carbon before and after nitrogen doping ( $0.145 \text{ mg cm}^{-2}$ ).

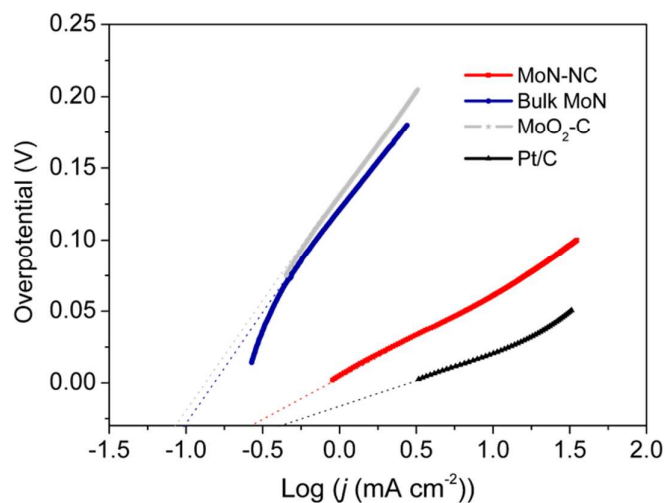

**Figure S11.** Calculated exchange current densities of the four samples by applying extrapolation method to the Tafel plots.

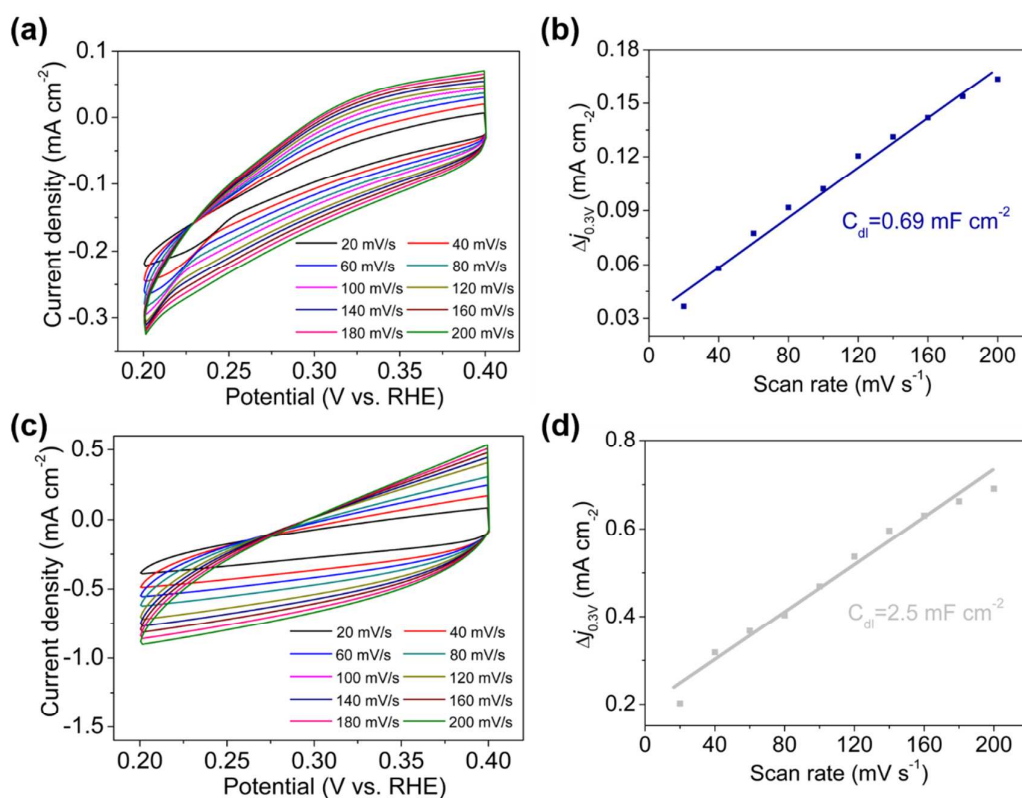

**Figure S12.** Electrochemical CV scans recorded for (a) bulk MoN and (c) intermediate MoO<sub>2</sub>-C catalysts at different potential scanning rates from 20 to 200 mV s<sup>-1</sup> in the potential range of 0.2-0.4 V. Linear fitting of the capacitive currents versus CV scan rates for (b) bulk MoN and (d) intermediate MoO<sub>2</sub>-C.

**Table S1** Comparison of electrocatalytic HER activity in acidic conditions (0.5 M H<sub>2</sub>SO<sub>4</sub>) for MoN-NC nano-octahedrons with some of the most active non-precious HER catalysts ever reported.

| Catalyst                          | Loading<br>(mg<br>cm <sup>-2</sup> ) | $\eta_{10}$<br>(mV) | Tafel<br>slope<br>(mV<br>dec <sup>-1</sup> ) | $j_0$<br>(mA<br>cm <sup>-2</sup> ) | Referenc<br>e        |
|-----------------------------------|--------------------------------------|---------------------|----------------------------------------------|------------------------------------|----------------------|
| <b>MoN-NC<br/>nanooctahedrons</b> | <b>0.145</b>                         | <b>62</b>           | <b>54</b>                                    | <b>0.778</b>                       | <b>This<br/>work</b> |
| Mo <sub>x</sub> C nanooctahedrons | 0.8                                  | 142                 | 53                                           | 0.023                              | [1]                  |
| Mo <sub>x</sub> C-Ni@NCV          | 1.1                                  | 68                  | 45                                           | 0.95                               | [2]                  |
| CoPS NP S                         | 0.36                                 | 48                  | 56                                           | 0.984                              | [3]                  |
| SCEIN/SWNT                        | 0.18                                 | 77                  | 40                                           | 0.19                               | [4]                  |
| Mo <sub>2</sub> C/CNT-graphene    | 0.65                                 | 130                 | 58                                           | 0.062                              | [5]                  |
| MoP S                             | 0.17                                 | 64                  | 50                                           | 0.2                                | [6]                  |
| P-WN/rGO                          | 0.337                                | 85                  | 54                                           | 0.35                               | [7]                  |
| CoP nanoparticles                 | 2                                    | 75                  | 50                                           | 0.14                               | [8]                  |
| MoDCA-5                           | 0.25                                 | 78                  | 41                                           | 0.178                              | [9]                  |
| MoCN NPs                          | 0.4                                  | 140                 | 46                                           | ---                                | [10]                 |
| Metallic WO <sub>2</sub> -carbon  | 0.35                                 | 58                  | 46                                           | 0.64                               | [11]                 |
| $\beta$ -Mo <sub>2</sub> C/rGO    | 0.47                                 | 109                 | 66.4                                         | 0.037                              | [12]                 |
| MoP                               | 0.39                                 | 150                 | 54                                           | 0.086                              | [13]                 |
| WS <sub>2</sub> nanosheets        | 1                                    | 142                 | 70                                           | ---                                | [14]                 |
| Co <sub>2</sub> P nanorods        | 1.02                                 | 134                 | 51.7                                         | 0.025                              | [15]                 |
| Ni <sub>2</sub> P nanoparticles   | 1                                    | 100                 | 46                                           | 0.033                              | [16]                 |
| CoSe <sub>2</sub> on carbon fiber | 2.2                                  | 137                 | 40                                           | 0.0049                             | [17]                 |



## References

- (1) Wu, H. B.; Xia, B. Y.; Yu, L.; Yu, X. Y.; Lou, X. W. *Nat. Commun.* **2015**, *6*, 6512.
- (2) Wang, S. P.; Wang, J.; Zhu, M. L.; Bao, X. B.; Xiao, B. Y.; Su, D. F.; Li, H. R.; Wang, Y. *J. Am. Chem. Soc.* **2015**, *137*, 15753-15759.
- (3) Caban-Acevedo, M.; Stone, M. L.; Schmidt, J. R.; Thomas, J. G.; Ding, Q.; Chang, H.-C.; Tsai, M.-L.; He, J.-H.; Jin, S. *Nat. Mater.* **2015**, *14*, 1245-1251.
- (4) Tavakkoli, M.; Kallio, T.; Reynaud, O.; Nasibulin, A. G.; Johans, C.; Sainio, J.; Jiang, H.; Kauppinen, E. I.; Laasonen, K. *Angew. Chem. Int. Ed.* **2015**, *54*, 4535-4538.
- (5) Youn, D. H.; Han, S.; Kim, J. Y.; Kim, J. Park, Y. H.; Choi, S. H.; Lee, J. S. *ACS Nano* **2014**, *8*, 5164-5173.
- (6) Kibsgaard, J.; Jaramillo, T. F. *Angew. Chem. Int. Ed.* **2014**, *53*, 14433-14437.
- (7) Yan, H. J.; Tian, C. G.; Wang, L.; Wu, A. P.; Meng, M. C.; Zhao, L.; Fu, H. G. *Angew. Chem. Int. Ed.* **2015**, *54*, 6423-6427.
- (8) Popczun, E. J.; Read, C. G.; Roske, C. W.; Lewis, N. S.; Schaak, R. E. *Angew. Chem. Int. Ed.* **2014**, *126*, 5531-5534.
- (9) Ma, R. G.; Zhou, Y.; Chen, Y. F.; Li, P. X.; Liu, Q.; Wang, J. C. *Angew. Chem. Int. Ed.* **2015**, *54*, 14723-14727..
- (10) Zhao, Y.; Kamiya, K.; Hashimoto, K.; Nakanishi, S. *J. Am. Chem. Soc.* **2015**, *137*, 110-113.
- (11) Wu, R.; Zhang, J. F.; Shi, Y. M.; Liu, D. L.; Zhang, B. *J. Am. Chem. Soc.* **2015**, *137*, 6983-6986.
- (12) Chen, W. F.; Iyer, S.; Iyer, S.; Sasaki, K.; Wang, C.-H.; Zhu, Y. M.; Muckerman, J. T.; Fujita, E. *Energy Environ. Sci.* **2013**, *6*, 1818-1826.
- (13) Xing, Z. C.; Liu, Q.; Asiri, A. M.; Sun, X. P. *Adv. Mater.* **2014**, *26*, 5702-5707.
- (14) Lukowski, M. A.; Daniel, A. S.; English, C. R.; Meng, F.; Forticaux, A.; Hamers, R. J.; Jin, S. *Energy Environ. Sci.* **2014**, *7*, 2608-2613.

- (15)Huang, Z. P.; Chen, Z. Z.; Chen, Z. B.; Lv, C. C.; Humphrey, M. G.; Zhang, C.  
*Nano Energy* **2014**, 9, 373-382.
- (16)Popczun, E. J.; McKone, J. R.; Read, C. G.; Biacchi, A. J.; Wilttrout, A. M.;  
Lewis, N. S.; Schaak, R. E. *J. Am. Chem. Soc.* **2013**, 135, 9267-9270.
- (17)Kong, D. S.; Wang, H. T.; Lu, Z. Y.; Cui, Y. *J. Am. Chem. Soc.* **2014**, 136,  
4897-4900.
